# Supplementary material for: Incidence of Post-Traumatic Stress Disorder After Road Traffic Accident
Source: PubMed Central journal article supplement (PMC6659351; doi:10.3389/fpsyt.2019.00519), 2019-07-19
Supplement: DataSheet_1.pdf [file DataSheet_1.pdf]

**Cor  
rela  
tion  
Mat  
rix<sup>a</sup>**

|                     | P1Flashback                                      | P2Nightmare                                      | P3Daydream                                       | P4Irritablefor<br>anymemory<br>oftheRTA          | P5physiologi<br>calchangefor<br>memoryof          | P6Trynottor<br>ememberthe<br>situation          | P7Avoidanc<br>e          | P8Am<br>ens<br>tic         | P9Lo<br>sofpl<br>easur<br>e         | P10Is<br>olat<br>ion         | P11slo<br>wne<br>ss         | P12feelin<br>goflosingt<br>hefuture         | P13sl<br>eeppr<br>oble<br>m         | P14Irri<br>tabl<br>ity         | P15Los<br>sofconc<br>entratio<br>n         | P16H<br>ypervi<br>gillian<br>t         | P17N<br>ervou<br>snes<br>s         |
|---------------------|--------------------------------------------------|--------------------------------------------------|--------------------------------------------------|--------------------------------------------------|---------------------------------------------------|-------------------------------------------------|--------------------------|----------------------------|-------------------------------------|------------------------------|-----------------------------|---------------------------------------------|-------------------------------------|--------------------------------|--------------------------------------------|----------------------------------------|------------------------------------|
| Cor<br>rela<br>tion | P1Flashback<br>1.000                             | P2Nightmare<br>.822                              | P3Daydream<br>.762                               | P4Irritablefor<br>anymemory<br>oftheRTA<br>.736  | P5physiologi<br>calchangefor<br>memoryof<br>.730  | P6Trynottor<br>ememberthe<br>situation<br>.682  | P7Avoidanc<br>e<br>.658  | P8Am<br>ens<br>tic<br>.676 | P9Lo<br>sofpl<br>easur<br>e<br>.605 | P10Is<br>olat<br>ion<br>.675 | P11slo<br>wne<br>ss<br>.651 | P12feelin<br>goflosingt<br>hefuture<br>.551 | P13sl<br>eeppr<br>oble<br>m<br>.493 | P14Irri<br>tabl<br>ity<br>.635 | P15Los<br>sofconc<br>entratio<br>n<br>.657 | P16H<br>ypervi<br>gillian<br>t<br>.396 | P17N<br>ervou<br>snes<br>s<br>.652 |
|                     | P2Nightmare<br>.822                              | P2Nightmare<br>1.000                             | P3Daydream<br>.742                               | P4Irritablefor<br>anymemory<br>oftheRTA<br>.714  | P5physiologi<br>calchangefor<br>memoryof<br>.711  | P6Trynottor<br>ememberthe<br>situation<br>.685  | P7Avoidanc<br>e<br>.687  | P8Am<br>ens<br>tic<br>.676 | P9Lo<br>sofpl<br>easur<br>e<br>.579 | P10Is<br>olat<br>ion<br>.685 | P11slo<br>wne<br>ss<br>.651 | P12feelin<br>goflosingt<br>hefuture<br>.525 | P13sl<br>eeppr<br>oble<br>m<br>.441 | P14Irri<br>tabl<br>ity<br>.593 | P15Los<br>sofconc<br>entratio<br>n<br>.641 | P16H<br>ypervi<br>gillian<br>t<br>.374 | P17N<br>ervou<br>snes<br>s<br>.640 |
|                     | P3Daydream<br>.762                               | P3Daydream<br>.742                               | P3Daydream<br>1.000                              | P4Irritablefor<br>anymemory<br>oftheRTA<br>.720  | P5physiologi<br>calchangefor<br>memoryof<br>.792  | P6Trynottor<br>ememberthe<br>situation<br>.724  | P7Avoidanc<br>e<br>.748  | P8Am<br>ens<br>tic<br>.736 | P9Lo<br>sofpl<br>easur<br>e<br>.629 | P10Is<br>olat<br>ion<br>.695 | P11slo<br>wne<br>ss<br>.661 | P12feelin<br>goflosingt<br>hefuture<br>.579 | P13sl<br>eeppr<br>oble<br>m<br>.506 | P14Irri<br>tabl<br>ity<br>.638 | P15Los<br>sofconc<br>entratio<br>n<br>.682 | P16H<br>ypervi<br>gillian<br>t<br>.374 | P17N<br>ervou<br>snes<br>s<br>.708 |
|                     | P4Irritablefor<br>anymemory<br>oftheRTA<br>.736  | P4Irritablefor<br>anymemory<br>oftheRTA<br>.714  | P4Irritablefor<br>anymemory<br>oftheRTA<br>.720  | P4Irritablefor<br>anymemory<br>oftheRTA<br>1.000 | P5physiologi<br>calchangefor<br>memoryof<br>.763  | P6Trynottor<br>ememberthe<br>situation<br>.700  | P7Avoidanc<br>e<br>.737  | P8Am<br>ens<br>tic<br>.696 | P9Lo<br>sofpl<br>easur<br>e<br>.658 | P10Is<br>olat<br>ion<br>.732 | P11slo<br>wne<br>ss<br>.661 | P12feelin<br>goflosingt<br>hefuture<br>.551 | P13sl<br>eeppr<br>oble<br>m<br>.522 | P14Irri<br>tabl<br>ity<br>.634 | P15Los<br>sofconc<br>entratio<br>n<br>.652 | P16H<br>ypervi<br>gillian<br>t<br>.326 | P17N<br>ervou<br>snes<br>s<br>.699 |
|                     | P5physiologi<br>calchangefor<br>memoryof<br>.730 | P5physiologi<br>calchangefor<br>memoryof<br>.711 | P5physiologi<br>calchangefor<br>memoryof<br>.792 | P5physiologi<br>calchangefor<br>memoryof<br>.763 | P5physiologi<br>calchangefor<br>memoryof<br>1.000 | P6Trynottor<br>ememberthe<br>situation<br>.728  | P7Avoidanc<br>e<br>.768  | P8Am<br>ens<br>tic<br>.771 | P9Lo<br>sofpl<br>easur<br>e<br>.643 | P10Is<br>olat<br>ion<br>.723 | P11slo<br>wne<br>ss<br>.728 | P12feelin<br>goflosingt<br>hefuture<br>.585 | P13sl<br>eeppr<br>oble<br>m<br>.570 | P14Irri<br>tabl<br>ity<br>.615 | P15Los<br>sofconc<br>entratio<br>n<br>.723 | P16H<br>ypervi<br>gillian<br>t<br>.398 | P17N<br>ervou<br>snes<br>s<br>.771 |
|                     | P6Trynottor<br>ememberthe<br>situation<br>.682   | P6Trynottor<br>ememberthe<br>situation<br>.685   | P6Trynottor<br>ememberthe<br>situation<br>.724   | P6Trynottor<br>ememberthe<br>situation<br>.700   | P6Trynottor<br>ememberthe<br>situation<br>.728    | P6Trynottor<br>ememberthe<br>situation<br>1.000 | P7Avoidanc<br>e<br>.699  | P8Am<br>ens<br>tic<br>.670 | P9Lo<br>sofpl<br>easur<br>e<br>.589 | P10Is<br>olat<br>ion<br>.645 | P11slo<br>wne<br>ss<br>.625 | P12feelin<br>goflosingt<br>hefuture<br>.529 | P13sl<br>eeppr<br>oble<br>m<br>.477 | P14Irri<br>tabl<br>ity<br>.544 | P15Los<br>sofconc<br>entratio<br>n<br>.643 | P16H<br>ypervi<br>gillian<br>t<br>.365 | P17N<br>ervou<br>snes<br>s<br>.671 |
|                     | P7Avoidanc<br>e<br>.658                          | P7Avoidanc<br>e<br>.687                          | P7Avoidanc<br>e<br>.748                          | P7Avoidanc<br>e<br>.737                          | P7Avoidanc<br>e<br>.768                           | P7Avoidanc<br>e<br>.699                         | P7Avoidanc<br>e<br>1.000 | P8Am<br>ens<br>tic<br>.661 | P9Lo<br>sofpl<br>easur<br>e<br>.625 | P10Is<br>olat<br>ion<br>.671 | P11slo<br>wne<br>ss<br>.652 | P12feelin<br>goflosingt<br>hefuture<br>.521 | P13sl<br>eeppr<br>oble<br>m<br>.485 | P14Irri<br>tabl<br>ity<br>.589 | P15Los<br>sofconc<br>entratio<br>n<br>.636 | P16H<br>ypervi<br>gillian<br>t<br>.337 | P17N<br>ervou<br>snes<br>s<br>.669 |

|                             |     |     |     |      |      |      |     |     |       |     |     |       |       |     |       |       |       |
|-----------------------------|-----|-----|-----|------|------|------|-----|-----|-------|-----|-----|-------|-------|-----|-------|-------|-------|
| P8Amenstic                  | .67 | .67 | .73 | .696 | .771 | .670 | .66 | 1.0 | .629  | .73 | .71 | .576  | .565  | .62 | .694  | .377  | .761  |
|                             | 6   | 6   | 6   |      |      |      | 1   | 00  |       | 2   | 1   |       |       | 2   |       |       |       |
| P9Lossofpleasure            | .60 | .57 | .62 | .658 | .643 | .589 | .62 | .62 | 1.000 | .61 | .60 | .561  | .527  | .54 | .588  | .424  | .641  |
|                             | 5   | 9   | 9   |      |      |      | 5   | 9   |       | 3   | 9   |       |       | 7   |       |       |       |
| P10Isolation                | .67 | .68 | .69 | .732 | .723 | .645 | .67 | .73 | .613  | 1.0 | .72 | .554  | .504  | .63 | .657  | .432  | .688  |
|                             | 5   | 5   | 5   |      |      |      | 1   | 2   |       | 00  | 1   |       |       | 6   |       |       |       |
| P11slownesses               | .65 | .65 | .66 | .661 | .728 | .625 | .65 | .71 | .609  | .72 | 1.0 | .607  | .578  | .64 | .675  | .379  | .701  |
|                             | 1   | 1   | 1   |      |      |      | 2   | 1   |       | 1   | 00  |       |       | 1   |       |       |       |
| P12feelingoflosingthefuture | .55 | .52 | .57 | .551 | .585 | .529 | .52 | .57 | .561  | .55 | .60 | 1.000 | .499  | .53 | .571  | .432  | .610  |
|                             | 1   | 5   | 9   |      |      |      | 1   | 6   |       | 4   | 7   |       |       | 8   |       |       |       |
| P13sleepproblem             | .49 | .44 | .50 | .522 | .570 | .477 | .48 | .56 | .527  | .50 | .57 | .499  | 1.000 | .52 | .552  | .483  | .566  |
|                             | 3   | 1   | 6   |      |      |      | 5   | 5   |       | 4   | 8   |       |       | 6   |       |       |       |
| P14Irritability             | .63 | .59 | .63 | .634 | .615 | .544 | .58 | .62 | .547  | .63 | .64 | .538  | .526  | 1.0 | .609  | .341  | .628  |
|                             | 5   | 3   | 8   |      |      |      | 9   | 2   |       | 6   | 1   |       |       | 00  |       |       |       |
| P15Lossofconcentration      | .65 | .64 | .68 | .652 | .723 | .643 | .63 | .69 | .588  | .65 | .67 | .571  | .552  | .60 | 1.000 | .368  | .738  |
|                             | 7   | 1   | 2   |      |      |      | 6   | 4   |       | 7   | 5   |       |       | 9   |       |       |       |
| P16Hypervigiliant           | .39 | .37 | .37 | .326 | .398 | .365 | .33 | .37 | .424  | .43 | .37 | .432  | .483  | .34 | .368  | 1.000 | .327  |
|                             | 6   | 4   | 4   |      |      |      | 7   | 7   |       | 2   | 9   |       |       | 1   |       |       |       |
| P17Nervousness              | .65 | .64 | .70 | .699 | .771 | .671 | .66 | .76 | .641  | .68 | .70 | .610  | .566  | .62 | .738  | .327  | 1.000 |
|                             | 2   | 0   | 8   |      |      |      | 9   | 1   |       | 8   | 1   |       |       | 8   |       |       |       |
| Sig. P1Flashback (1-tailed) |     | .00 | .00 | .000 | .000 | .000 | .00 | .00 | .000  | .00 | .00 | .000  | .000  | .00 | .000  | .000  | .000  |
| P2Nightmare                 | .00 |     | .00 | .000 | .000 | .000 | .00 | .00 | .000  | .00 | .00 | .000  | .000  | .00 | .000  | .000  | .000  |
|                             | 0   |     | 0   |      |      |      | 0   | 0   |       | 0   | 0   |       |       | 0   |       |       |       |
| P3Daydream                  | .00 | .00 |     | .000 | .000 | .000 | .00 | .00 | .000  | .00 | .00 | .000  | .000  | .00 | .000  | .000  | .000  |
|                             | 0   | 0   |     |      |      |      | 0   | 0   |       | 0   | 0   |       |       | 0   |       |       |       |

|                                              |          |          |          |      |      |      |          |          |      |          |          |      |      |          |      |      |      |
|----------------------------------------------|----------|----------|----------|------|------|------|----------|----------|------|----------|----------|------|------|----------|------|------|------|
| P4Irritablefor<br>anymemory<br>oftheRTA      | .00<br>0 | .00<br>0 | .00<br>0 |      | .000 | .000 | .00<br>0 | .00<br>0 | .000 | .00<br>0 | .00<br>0 | .000 | .000 | .00<br>0 | .000 | .000 | .000 |
| P5physiologi<br>calchange<br>for<br>memoryof | .00<br>0 | .00<br>0 | .00<br>0 | .000 |      | .000 | .00<br>0 | .00<br>0 | .000 | .00<br>0 | .00<br>0 | .000 | .000 | .00<br>0 | .000 | .000 | .000 |
| P6Trynotto<br>rememberthe<br>situation       | .00<br>0 | .00<br>0 | .00<br>0 | .000 | .000 |      | .00<br>0 | .00<br>0 | .000 | .00<br>0 | .00<br>0 | .000 | .000 | .00<br>0 | .000 | .000 | .000 |
| P7Avoidanc<br>e                              | .00<br>0 | .00<br>0 | .00<br>0 | .000 | .000 | .000 |          | .00<br>0 | .000 | .00<br>0 | .00<br>0 | .000 | .000 | .00<br>0 | .000 | .000 | .000 |
| P8Amenstic                                   | .00<br>0 | .00<br>0 | .00<br>0 | .000 | .000 | .000 | .00<br>0 |          | .000 | .00<br>0 | .00<br>0 | .000 | .000 | .00<br>0 | .000 | .000 | .000 |
| P9Lossofple<br>asure                         | .00<br>0 | .00<br>0 | .00<br>0 | .000 | .000 | .000 | .00<br>0 | .00<br>0 |      | .00<br>0 | .00<br>0 | .000 | .000 | .00<br>0 | .000 | .000 | .000 |
| P10Isolation                                 | .00<br>0 | .00<br>0 | .00<br>0 | .000 | .000 | .000 | .00<br>0 | .00<br>0 | .000 |          | .00<br>0 | .000 | .000 | .00<br>0 | .000 | .000 | .000 |
| P11slownes<br>s                              | .00<br>0 | .00<br>0 | .00<br>0 | .000 | .000 | .000 | .00<br>0 | .00<br>0 | .000 | .00<br>0 |          | .000 | .000 | .00<br>0 | .000 | .000 | .000 |
| P12feelingof<br>losingthefutu<br>re          | .00<br>0 | .00<br>0 | .00<br>0 | .000 | .000 | .000 | .00<br>0 | .00<br>0 | .000 | .00<br>0 | .00<br>0 |      | .000 | .00<br>0 | .000 | .000 | .000 |
| P13sleeppro<br>blem                          | .00<br>0 | .00<br>0 | .00<br>0 | .000 | .000 | .000 | .00<br>0 | .00<br>0 | .000 | .00<br>0 | .00<br>0 | .000 |      | .00<br>0 | .000 | .000 | .000 |
| P14Irritability                              | .00<br>0 | .00<br>0 | .00<br>0 | .000 | .000 | .000 | .00<br>0 | .00<br>0 | .000 | .00<br>0 | .00<br>0 | .000 | .000 |          | .000 | .000 | .000 |

|                          |          |          |          |      |      |      |          |          |      |          |          |      |      |          |      |      |
|--------------------------|----------|----------|----------|------|------|------|----------|----------|------|----------|----------|------|------|----------|------|------|
| P15Loss of concentration | .00<br>0 | .00<br>0 | .00<br>0 | .000 | .000 | .000 | .00<br>0 | .00<br>0 | .000 | .00<br>0 | .00<br>0 | .000 | .000 | .00<br>0 | .000 | .000 |
| P16Hypervigilant         | .00<br>0 | .00<br>0 | .00<br>0 | .000 | .000 | .000 | .00<br>0 | .00<br>0 | .000 | .00<br>0 | .00<br>0 | .000 | .000 | .00<br>0 | .000 | .000 |
| P17Nervousness           | .00<br>0 | .00<br>0 | .00<br>0 | .000 | .000 | .000 | .00<br>0 | .00<br>0 | .000 | .00<br>0 | .00<br>0 | .000 | .000 | .00<br>0 | .000 | .000 |

a.  
 Determinant =  
 2.8  
 3E-  
 007
